# Supplementary material
Source: publisher site journal article supplement (https://www.spandidos-publications.com/1360/downloadSupplementary)
Supplement: Supplementary file 1 [file downloadSupplementary]

Figure S1. Association of PD-1 and CD38/CD101 expression with serum levels of CA125 and HE4 following surgery and first chemotherapy in patients with ovarian cancer. PD-1, programmed cell death-1; CA125, cancer antigen 125; HE4, human epididymis protein 4.

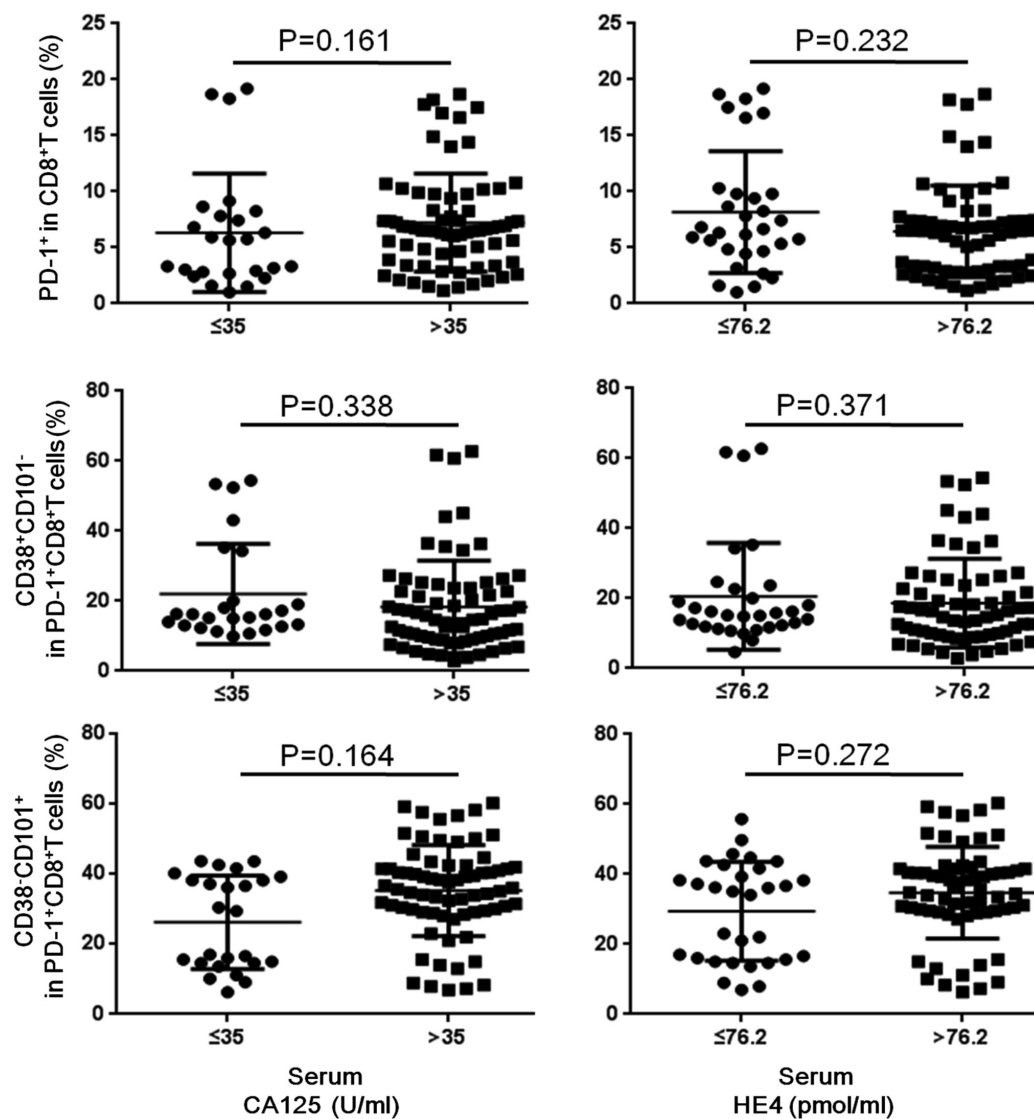

Figure S2. Association of PD-1, CD38 and CD101 expression on TILs with age, pathological grade and lymph node metastasis. PD-1 and CD38/CD101 expression on TILs based on (A) clinical parameters of patients with OC and (B) serum levels of CA125 and HE4 following chemotherapy in patients with OC. PD-1, programmed cell death-1; TILs, tumor-infiltrating lymphocytes; OC, ovarian cancer; CA125, cancer antigen 125; HE4, human epididymis protein 4.

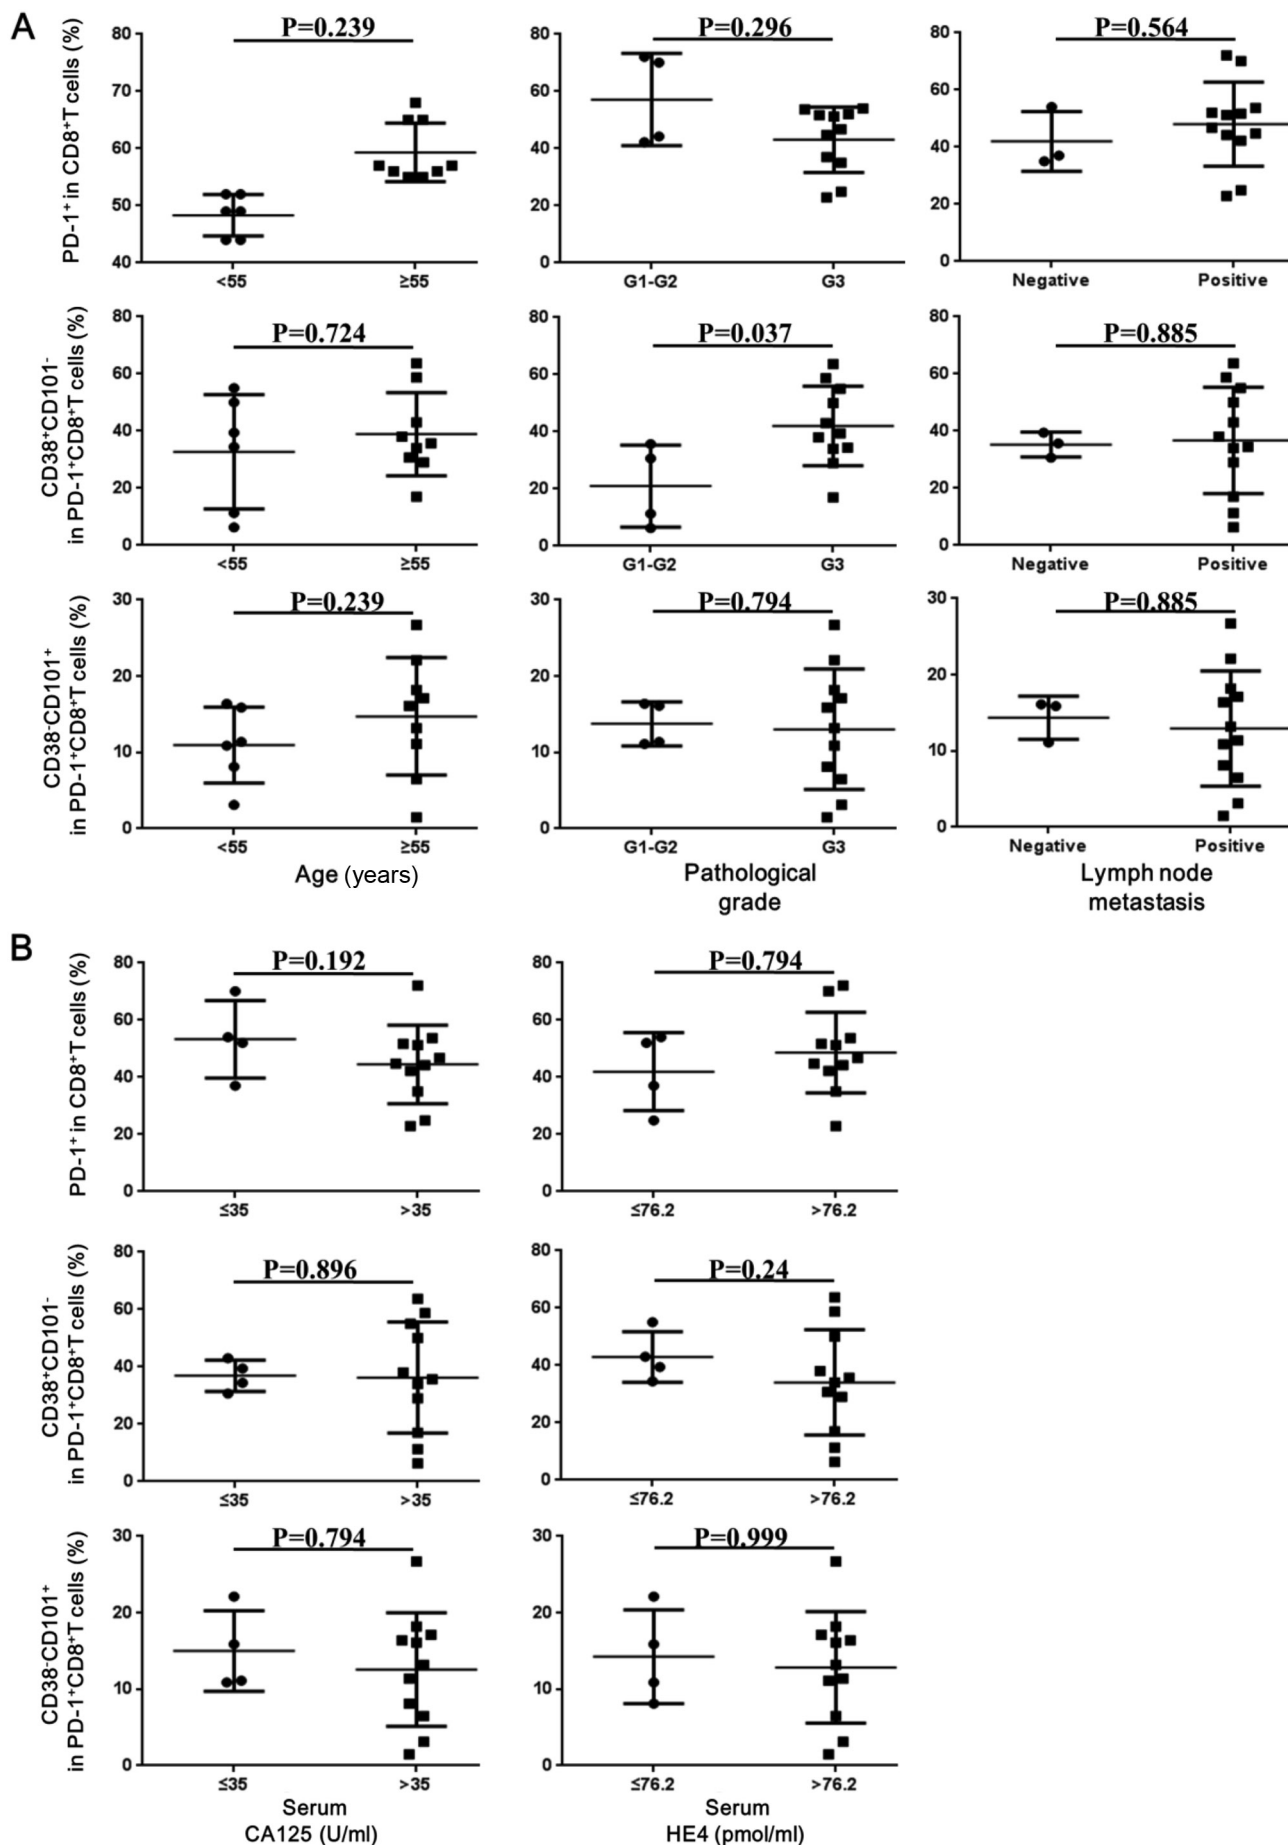

Table SI. Association of PD-1 and CD38/CD101 expression with clinical parameters in patients with ovarian cancer.

| Clinicopathological parameters         | n  | PD-1 <sup>+</sup> |      | P-value | CD38 <sup>+</sup> CD101 <sup>-</sup> |      | P-value | CD38 <sup>-</sup> CD101 <sup>+</sup> |      | P-value |
|----------------------------------------|----|-------------------|------|---------|--------------------------------------|------|---------|--------------------------------------|------|---------|
|                                        |    | Low               | High |         | Low                                  | High |         | Low                                  | High |         |
| Age (years)                            |    |                   |      | 0.304   |                                      |      | 0.304   |                                      |      | 0.063   |
| <55                                    | 54 | 30                | 24   |         | 30                                   | 24   |         | 32                                   | 22   |         |
| ≥55                                    | 42 | 18                | 24   |         | 18                                   | 24   |         | 16                                   | 26   |         |
| Pathological grade                     |    |                   |      | 0.101   |                                      |      | 0.101   |                                      |      | 0.051   |
| Well/moderately differentiated (G1-G2) | 45 | 18                | 27   |         | 18                                   | 27   |         | 15                                   | 20   |         |
| Poorly differentiated (G3)             | 51 | 30                | 21   |         | 30                                   | 21   |         | 33                                   | 18   |         |
| Tumor grade                            |    |                   |      | 0.062   |                                      |      | 0.352   |                                      |      | 0.062   |
| T1-T2                                  | 25 | 8                 | 17   |         | 15                                   | 10   |         | 17                                   | 8    |         |
| T3-T4                                  | 71 | 40                | 31   |         | 33                                   | 38   |         | 31                                   | 40   |         |
| Lymph node metastasis                  |    |                   |      | 0.053   |                                      |      | 0.251   |                                      |      | 0.491   |
| N0                                     | 26 | 9                 | 17   |         | 16                                   | 10   |         | 15                                   | 11   |         |
| N1                                     | 70 | 39                | 31   |         | 32                                   | 38   |         | 33                                   | 37   |         |

All the P-values were calculated using the  $\chi^2$  test. PD-1, programmed cell death-1.
